# Supplementary material
Source: HighWire-hosted journal article supplement (doi:10.1101/rna.073809.119)
Supplement: Supplemental_Dataset.xlsx [file Supplemental_Dataset.xlsx]

## Sheet: Table1 (Dataset)
	RNA type	Organism	PDB Code	Resolution	Length	Chain	Family	BIT Score	Nseq eff	Hi/Low set
				(Å)
1	Phe-tRNA	Saccaromyces Cerevisiae	1ehz	1.93	76	A	RF00005	65.6	461.009	H
2	Sec-tRNA	Mus Musculus	3rg5	2	86	A	RF01852	80.5	268.101	H
3	TPP riboswitch	Arabidopsis Thaliana	3d2g	2.25	77	A	RF00059	61	1241.93	H
4	7SK RNA	Homo Sapiens	5lys	2.32	57	A	RF00100	47.3	1679.75	H
5	SAM-I riboswitch	Thermoanaerobacter Tencongensis	3gx5	2.4	94	A	RF00162	85.3	322.101	H
6	Adenine Riboswitch	Vibrio vulnificus	4tzx	2	71	X	RF00167	59.4	458.874	H
7	Lysine riboswitch	Thermotoga Maritima	3dil	1.9	174	A	RF00168	103.1	1455.51	H
8	GlmS ribozyme	Thermoanaerobacter Tencongensis	2h0s	2.35	125	B	RF00234	74.8	603.709	H
9	M-box Riboswitch	Bacillus Subtilis	3pdr	1.85	161	A	RF00380	139.6	119.645	H
10	3',3'-cGAMP riboswitch	Geobacter	4yaz	2	84	A	RF01051	49.3	583.357	H
11	2'- Deoxyguanosine riboswitch	Mesoplasma Florus	3slq	2.5	68	A	RF01510	81.2	6.64286	L
12	Fluoride riboswitch	Thermotoga petrophila	4enc	2.27	52	A	RF01734	37.7	222.076	H
13	ZMP riboswitch	Actinomyces odontolyticus	4xwf	1.8	64	A	RF01750	40.8	130.655	H
14	Guanidine III riboswitch	Thermobifida fusca	5nwq	1.91	41	A	RF01763	50.9	5.05912	L
15	c-di-GMP-II riboswitch	Clostridium acetobutylicum	3q3z	2.51	75	A	RF01786	63.3	372.13	H
16	THF riboswitch	Streptococcus Mutans	4lvv	2.1	89	A	RF01831	67.5	187.739	H
17	SRP Alu domain	Bacillus Subtilis	4wfl	2.49	107	A	RF01854	90.4	176.994	H
18	P4-P6 RNA Ribozyme domain	Synthetic	1gid	2.5	158	A	RF00028	40.8	799.302	H
19	7S.S SRP	Methanocaldococcus jannaschii	1z43	2.6	101	A	RF00169	42.3	281.462	H
20	SAM-III Riboswitch	Enterococcus faecalis	3e5c	2.25	53	A	RF01767	42.4	13.6208	L
21	HDV ribozyme	Hepatitis delta virus	3nkb	1.9	64	B	RF02682	22.3	40.9757	L
22	S-Adenosylhomocysteine riboswitch	Ralstonia solanacearum	3npq	2.18	51	A	RF01057	31.5	10.4576	L
23	Hammerhead Ribozyme	Synthetic	3zp8	1.5	43	A	RF00163	27.6	59.0454	L
24	preQ1 riboswitch	Lactobacillus rhamnosus	4jf2	2.28	77	A	RF01054	35	14.558	L
25	Myotonic Dystrophy Type 2	Homo Sapiens	4k27	2.35	55	U	RF02695	7.1	32	L
26	Twister Ribozyme	Oryza sativa	4oji	2.3	51	A	RF02684	23.4	4.65954	L
27	mRNA for the coat protein	Turnip yellow mosaic virus	4p5j	1.99	86	A	RF00233	94.2	16.2207	L
28	Lariat capping ribozyme	Didymium iridis	4p95	2.5	189	A	RF01807	81.2	3.16364	L
29	Xrn1-resistant	Murray Valley encephalitis virus	4pqv	2.46	68	A	RF01415	48.3	4.86238	L
30	ydao riboswitch	Caldanaerobacter Tengcongensis MB4	4qln	2.65	117	A	RF00379	85.5	998.938	H
31	NiCo transition-metal riboswitch	Synthetic	4rum	2.65	93	A	RF02683	60.2	117.035	H
32	OMe substituted twister ribozyme	Synthetic	5dun	2.64	54	A	RF00921	9.6	2	L
33	Native pistol ribozyme	Synthetic	5k7d	2.68	47	A	RF02679	33.8	32.3735	L
34	5-hydroxytryptophan aptamer	Synthetic	5kpy	2	71	A	RF01982	8	2	L
35	ASH1 mRNA	Saccaromyces Cerevisiae	5m0h	2.65	42	A	RF00606	6.8	2	L
36	iSpinach aptamer	Synthetic	5ob3	2	69	A	RF01300	8.8	2	L
37	Twister Ribozyme	Synthetic	5t5a	2	62	A	RF02681	18.8	2	L
38	ykkC riboswitch	Dickeya dadantii	5u3g	2.3	85	B	RF00442	68.9	33.886	L
39	YkoY riboswitch	Lactococcus lactis	6cb3	1.89	101	A	RF00080	39	409.471	H
40	PRPP riboswitch	Thermoanaerobacter mathranii	6ck5	2.5	108	A	RF00442	58.2	116.965	H
41	metY SAM-V riboswitch	Candidatus Pelagibacter	6fz0	2.5	48	A	RF01826	44.4	2.80618	L
42	Ligase Ribozyme	Sulfobacillus acidophilus	2oiu	2.6	71	P	RF03017	9.7	2.00362	L
43	THF riboswitch	Eubacterium siraeum V10Sc8a	3suh	2.65	101	X	RF01831	97.3	198.48	H
44	Guanidine I riboswitch	Sulfobacillus acidophilus	5t83	2.71	90	A	RF00442	73.5	116.239	H
45	Ribonuclease P	Bacillus subtilis	1nbs	3.15	120	A	RF00011	94	157.58	H
46	23S Ribosomal RNA	Haloarcula marismortui	1ffz	3.2	497	A	RF02540	518.8	120.116	H
47	IIIabc four-way junction	Hepatitis C virus	1kh6	2.9	48	A	RF00061	13.5	1.00985	L
48	ai5g group II Self-splicing intron	Saccaromyces Cerevisiae	1kxk	3	70	A	RF00029	44.9	50.9603	L
49	Ribonuclease P	Thermus thermophilus	1u9s	2.9	155	A	RF00010	114.4	1285.28	H
50	s2m RNA	SRS Virus	1xjr	2.7	47	A	RF00164	65.1	3.29334	L
51	Group I ribozyme	Staphylococcus virus Twort	1y0q	3.6	229	A	RF00028	79.3	807.443	H
52	Ribonuclease P	Bacillus stearothermophilus	2a64	3.3	298	A	RF00011	228.6	170.698	H
53	Ribosomal Binding Domain of the IRES RNA	Plautia Stali Intestine Virus	2il9	3.1	135	A	RF00458	72.7	14	L
54	Initiator tRNA	Escherichia Coli	3cw5	3.1	77	A	RF00005	60.8	705.011	H
55	FMN Riboswitch	Fusobacterium nucleatum	3f2q	2.95	108	X	RF00050	101.7	104.843	H
56	Domain II of glycine riboswitch	Vibrio cholerae	3ox0	3.05	87	A	RF00504	64.6	847.594	H
57	Prohead RNA	Bacillus subtilis	3r4f	3.5	66	A	RF00044	34.1	2	L
58	RES pseudoknot domain	Hepatitis C virus	3t4b	3.55	84	A	RF00061	42.5	3.60911	L
59	Cobalamin riboswitch aptamer domain	Marine metagenome	4frg	2.95	84	B	RF01689	53.2	62.7997	L
60	Adenosylcobalamin riboswitch	Symbiobacterium thermophilum	4gxy	3.05	162	A	RF00174	116	6987.22	H
61	Distal Stem I region of the glyQS T box leader RNA	Geobacillus kaustophilus	4jrc	2.67	57	A	RF02447	9.9	6.77125	L
62	SAM-I/IV variant riboswitch aptamer	Marine metagenome	4l81	2.95	96	A	RF01725	40.4	210.969	H
63	Core ENE hairpin and A-rich tract from MALAT1	Homo Sapiens	4plx	3.1	76	A	RF02266	18.3	2	L
64	Ribozyme	Varkud Satellite	4r4v	3.07	186	A	RF02927	11.3	2	L
65	PreQ1-III Riboswitch	Faecalibacterium prausnitzii	4rzd	2.75	99	A	RF02680	106.8	2.60238	L
66	group II intron, domain 1	Oceanobacillus iheyensis	4y1o	2.95	258	A	RF02001	114.4	248.274	H
67	YrlA effector-binding module	Salmonella enterica	6cu1	3	80	A	RF02553	55	91.3703	H
68	Exoribonuclease-resistant RNA	Sweet clover necrotic mosaic virus	6d3p	2.9	45	A	RF02888	12	1	L
69	PRPP Riboswitch	Syntrophothermus lipocalidus	6dnr	2.9	107	A	RF00442	64.6	137.839	H

## Sheet: Table 2 (DCA Methods L2)
	PDB Code	Chain	Family	pydca	EVFold	Boltzmann	Gremlin	CCMPRED	PSICOV	Average
	1ehz	A	RF00005	0.736842	0.710526	0.736842	0.684211	0.736842	0.763158	0.72807
	3rg5	A	RF01852	0.744186	0.72093	0.744186	0.72093	0.744186	0.837209	0.751938
	3d2g	A	RF00059	0.657895	0.684211	0.710526	0.657895	0.684211	0.657895	0.675439
	5lys	A	RF00100	0.785714	0.785714	0.714286	0.75	0.785714	0.821429	0.773809
	3gx5	A	RF00162	0.702128	0.680851	0.659574	0.638298	0.659574	0.638298	0.663121
	4tzx	X	RF00167	0.833333	0.833333	0.777778	0.666667	0.75	0.75	0.768518
	3dil	A	RF00168	0.724138	0.712644	0.701149	0.666667	0.678161	0.651163	0.688987
	2h0s	B	RF00234	0.596774	0.612903	0.629032	0.532258	0.516129	0.532258	0.569892
	3pdr	A	RF00380	0.6625	0.675	0.65	0.6125	0.6375	0.625	0.64375
	4yaz	A	RF01051	0.666667	0.714286	0.714286	0.714286	0.666667	0.666667	0.690477
	3slq	A	RF01510	0.393939	0.30303	0.4	0.30303	0.333333	0.333333	0.344444
	4enc	A	RF01734	0.692308	0.615385	0.576923	0.576923	0.653846	0.653846	0.628205
	4xwf	A	RF01750	0.5	0.53125	0.5	0.5	0.5625	0.65625	0.541667
	5nwq	A	RF01763	0.35	0.35	0.35	0.35	0.4	0.35	0.358333
	3q3z	A	RF01786	0.710526	0.736842	0.736842	0.710526	0.736842	0.710526	0.723684
	4lvv	A	RF01831	0.681818	0.659091	0.704545	0.681818	0.636364	0.636364	0.666667
	4wfl	A	RF01854	0.72	0.740741	0.703704	0.703704	0.703704	0.722222	0.715679
	1gid	A	RF00028	0.379747	0.493671	0.481013	0.405063	0.43038	0.379747	0.42827
	1z43	A	RF00169	0.4	0.52	0.54	0.5	0.54	0.52	0.503333
	3e5c	A	RF01767	0.384615	0.346154	0.307692	0.307692	0.307692	0.269231	0.320513
	3nkb	B	RF02682	0.34375	0.3125	0.25	0.4375	0.3125	0.34375	0.333333
	3npq	A	RF01057	0.423077	0.423077	0.538462	0.384615	0.423077	0.461538	0.442308
	3zp8	A	RF00163	0.0454545	0	0	0	0.0454545	0	0.0151515
	4jf2	A	RF01054	0.421053	0.421053	0.289474	0.289474	0.315789	0.368421	0.350877
	4k27	U	RF02695	0.214286	0.214286	0.142857	0.178571	0.214286	0.25	0.202381
	4oji	A	RF02684	0.0384615	0.0769231	0.0769231	0.0384615	0.0384615	0.0769231	0.0576923
	4p5j	A	RF00233	0.52381	0.534884	0.452381	0.488372	0.465116	0.512195	0.496126
	4p95	A	RF01807	0.0319149	0.0638298	0.0638298	0.0638298	0.0638298	0.0425532	0.0549646
	4pqv	A	RF01415	0.176471	0.205882	0.205882	0.176471	0.176471	0.205882	0.191176
	4qln	A	RF00379	0.62069	0.689655	0.586207	0.672414	0.62069	0.586207	0.62931
	4rum	A	RF02683	0.652174	0.630435	0.608696	0.478261	0.565217	0.543478	0.57971
	5dun	A	RF00921	0.0740741	0.111111	0.185185	0.0740741	0.0740741	0.148148	0.111111
	5k7d	A	RF02679	0.458333	0.5	0.5	0.416667	0.458333	0.458333	0.465278
	5kpy	A	RF01982	0.0555556	0.333333	0.25	0.0555556	0.277778	0.0833333	0.175926
	5m0h	A	RF00606	0.190476	0	0	0.142857	0.0952381	0.047619	0.079365
	5ob3	A	RF01300	0.117647	0.205882	0.147059	0.147059	0.176471	0	0.132353
	5t5a	A	RF02681	0.225806	0.193548	0.129032	0.193548	0.193548	0.193548	0.188172
	5u3g	B	RF00442	0.404762	0.404762	0.428571	0.404762	0.380952	0.380952	0.400794
	6cb3	A	RF00080	0.361702	0.446809	0.361702	0.361702	0.375	0.404255	0.385195
	6ck5	A	RF00442	0.388889	0.444444	0.425926	0.407407	0.388889	0.37037	0.404321
	6fz0	A	RF01826	0.208333	0	0.166667	0.125	0.0833333	0.208333	0.131944
	2oiu	P	RF03017	0.111111	0.111111	0.111111	0.111111	0.111111	0.0833333	0.106481
	3suh	X	RF01831	0.52	0.56	0.58	0.52	0.52	0.48	0.53
	5t83	A	RF00442	0.466667	0.422222	0.511111	0.466667	0.422222	0.422222	0.451852
	1nbs	A	RF00011	0.65	0.65	0.666667	0.633333	0.6	0.65	0.641667
	1ffz	A	RF02540	0.701613	0.741935	0.649194	0.592742	0.616935	0.528226	0.638441
	1kh6	A	RF00061	0.166667	0.125	0.125	0.166667	0.166667	0.208333	0.159722
	1kxk	A	RF00029	0.342857	0.542857	0.514286	0.4	0.428571	0.428571	0.442857
	1u9s	A	RF00010	0.679487	0.692308	0.692308	0.666667	0.705128	0.666667	0.683761
	1xjr	A	RF00164	0.416667	0.458333	0.375	0.5	0.375	0.375	0.416667
	1y0q	A	RF00028	0.307018	0.447368	0.447368	0.438596	0.438596	0.421053	0.416666
	2a64	A	RF00011	0.657	0.684564	0.651007	0.610738	0.61745	0.583893	0.634109
	2il9	A	RF00458	0.176471	0.25	0.220588	0.220588	0.176471	0.161765	0.200981
	3cw5	A	RF00005	0.657	0.684	0.684	0.632	0.763158	0.763	0.697193
	3f2q	X	RF00050	0.62963	0.611111	0.666667	0.555556	0.574074	0.592593	0.604939
	3ox0	A	RF00504	0.659091	0.704545	0.704545	0.659091	0.636364	0.636364	0.666667
	3r4f	A	RF00044	0.242424	0.242424	0.181818	0.272727	0.181818	0.181818	0.217171
	3t4b	A	RF00061	0.238095	0.285714	0.0714286	0.119048	0.142857	0.0238095	0.146825
	4frg	B	RF01689	0.547619	0.547619	0.642857	0.5	0.571	0.571429	0.563421
	4gxy	A	RF00174	0.617284	0.641975	0.580247	0.580247	0.592593	0.604938	0.602881
	4jrc	A	RF02447	0.214286	0.25	0.214286	0.214286	0.25	0.25	0.232143
	4l81	A	RF01725	0.520833	0.5	0.479167	0.395833	0.458333	0.4375	0.465278
	4plx	A	RF02266	0	0.0789474	0.0526316	0.131579	0.0789474	0.0789474	0.0701755
	4r4v	A	RF02927	0.182796	0.182796	0.204301	0.172043	0.139785	0.0752688	0.159498
	4rzd	A	RF02680	0.26	0.3	0.22	0.3	0.32	0.26	0.276667
	4y1o	A	RF02001	0.294574	0.341085	0.372093	0.302326	0.3	0.310078	0.320026
	6cu1	A	RF02553	0.65	0.6	0.6	0.55	0.625	0.65	0.6125
	6d3p	A	RF02888	0	0.136364	0	0	0.181818	0.181818	0.0833333
	6dnr	A	RF00442	0.462963	0.462963	0.462963	0.444444	0.425926	0.388889	0.441358
			Average	0.430029	0.447742	0.432288	0.411237	0.425043	0.418492	0.427472

## Sheet: Table 3 (Search L2)
	PDB Code	Chain	Family	Rfam 14.1	E-value 0,99	E-value 0,0001
	1ehz	A	RF00005	0.736842	0.736842	0.737
	3rg5	A	RF01852	0.744186	0.860465	0.814
	3d2g	A	RF00059	0.657895	0.657895	0.657895
	5lys	A	RF00100	0.785714	0.785714	0.785714
	3gx5	A	RF00162	0.702128	0.702128	0.702128
	4tzx	X	RF00167	0.833333	0.833333	0.833333
	3dil	A	RF00168	0.724138	0.712644	0.712644
	2h0s	B	RF00234	0.596774	0.580645	0.580645
	3pdr	A	RF00380	0.6625	0.6625	0.6625
	4yaz	A	RF01051	0.666667	0.666667	0.738095
	3slq	A	RF01510	0.393939	0.545455	0.393939
	4enc	A	RF01734	0.692308	0.692308	0.576923
	4xwf	A	RF01750	0.5	0.53125	0.40625
	5nwq	A	RF01763	0.35	0.35	0.4
	3q3z	A	RF01786	0.710526	0.684211	0.710526
	4lvv	A	RF01831	0.681818	0.681818	0.681818
	4wfl	A	RF01854	0.72	0.78	0.764706
	1gid	A	RF00028	0.379747	0.35443	0.35443
	1z43	A	RF00169	0.4	0.36	0.38
	3e5c	A	RF01767	0.384615	0.384615	0.384615
	3nkb	B	RF02682	0.34375	0.375	0.34375
	3npq	A	RF01057	0.423077	0.423077	0.423077
	3zp8	A	RF00163	0.0454545	0	0.0454545
	4jf2	A	RF01054	0.421053	0.421053	0.394737
	4k27	U	RF02695	0.214286	0.214286	0.178571
	4oji	A	RF02684	0.0384615	0.0384615	0.115385
	4p5j	A	RF00233	0.52381	0.439024	0.5
	4p95	A	RF01807	0.0319149	0.0319149	0.0319149
	4pqv	A	RF01415	0.176471	0.176471	0.176471
	4qln	A	RF00379	0.62069	0.62069	0.62069
	4rum	A	RF02683	0.652174	0.652174	0.543478
	5dun	A	RF00921	0.0740741	0.259259	0.0740741
	5k7d	A	RF02679	0.458333	0.458333	0.416667
	5kpy	A	RF01982	0.0555556	0.0833333	0.0833333
	5m0h	A	RF00606	0.190476	0.0952381	0.0952381
	5ob3	A	RF01300	0.117647	0.294118	0.0882353
	5t5a	A	RF02681	0.225806	0.193548	0.193548
	5u3g	B	RF00442	0.404762	0.404762	0.404762
	6cb3	A	RF00080	0.361702	0.361702	0.361702
	6ck5	A	RF00442	0.388889	0.388889	0.388889
	6fz0	A	RF01826	0.208333	0.208333	0.208333
	2oiu	P	RF03017	0.111111	0.111111	0.111111
	3suh	X	RF01831	0.52	0.52	0.52
	5t83	A	RF00442	0.466667	0.466667	0.466667
	1nbs	A	RF00011	0.65	0.733333	0.716667
	1ffz	A	RF02540	0.701613	0.701613	0.0282258
	1kh6	A	RF00061	0.166667	0.416667	0.416667
	1kxk	A	RF00029	0.342857	0.342857	0.342857
	1u9s	A	RF00010	0.679487	0.666667	0.653846
	1xjr	A	RF00164	0.416667	0.416667	0.416667
	1y0q	A	RF00028	0.307018	0.289474	0.298246
	2a64	A	RF00011	0.677852	0.718121	0.711409
	2il9	A	RF00458	0.176471	0.176471	0.176471
	3cw5	A	RF00005	0.657	0.657	0.657
	3f2q	X	RF00050	0.62963	0.611111	0.611111
	3ox0	A	RF00504	0.659091	0.659091	0.681818
	3r4f	A	RF00044	0.242424	0.242424	0.212121
	3t4b	A	RF00061	0.238095	0.261905	0.119048
	4frg	B	RF01689	0.547619	0.571429	0.547619
	4gxy	A	RF00174	0.617284	0.617284	0.592593
	4jrc	A	RF02447	0.214286	0.178571	0.214286
	4l81	A	RF01725	0.520833	0.479167	0.5
	4plx	A	RF02266	0	0	0
	4r4v	A	RF02927	0.182796	0.0107527	0.0107527
	4rzd	A	RF02680	0.26	0.32	0.26
	4y1o	A	RF02001	0.294574	0.286822	0.294574
	6cu1	A	RF02553	0.65	0.625	0.625
	6d3p	A	RF02888	0	0	0
	6dnr	A	RF00442	0.462963	0.444444	0.444
			Average	0.430331	0.438076	0.414409

## Sheet: Table 4 (Align L2)
	PDB Code	Chain	Family	Infernal	Clustal	MUSCLE	MAFFT
	1ehz	A	RF00005	0.736842	0.710526	0.368421	0.631579
	3rg5	A	RF01852	0.744186	0.209302	0.348837	0.255814
	3d2g	A	RF00059	0.657895	0.0263158	0.5	0.342105
	5lys	A	RF00100	0.785714	0	0	0.0714286
	3gx5	A	RF00162	0.702128	0.170213	0.404255	0.574468
	4tzx	X	RF00167	0.833333	0.527778	0.583333	0.444444
	3dil	A	RF00168	0.724138	0.296296	0.436782	0.162791
	2h0s	B	RF00234	0.596774	0.229508	0.65	0.355932
	3pdr	A	RF00380	0.6625	0.5	0.3875	0.5375
	4yaz	A	RF01051	0.666667	0.0238095	0.238095	0.5
	3slq	A	RF01510	0.393939	0.34375	0.375	0.375
	4enc	A	RF01734	0.692308	0.346154	0.615385	0.615385
	4xwf	A	RF01750	0.5	0.25	0.375	0.34375
	5nwq	A	RF01763	0.35	0.4	0.45	0.4
	3q3z	A	RF01786	0.710526	0.578947	0.736842	0.631579
	4lvv	A	RF01831	0.681818	0.568182	0.727273	0.704545
	4wfl	A	RF01854	0.72	0.245283	0.365385	0.444444
	1gid	A	RF00028	0.379747	0.0253165	0.0126582	0.189873
	1z43	A	RF00169	0.4	0.36	0.02	0.18
	3e5c	A	RF01767	0.384615	0	0.230769	0.0769231
	3nkb	B	RF02682	0.34375	0.34375	0.125	0.125
	3npq	A	RF01057	0.423077	0.153846	0.461538	0.384615
	3zp8	A	RF00163	0.0454545	0.0454545	0.0454545	0.0454545
	4jf2	A	RF01054	0.421053	0.184211	0.210526	0.184211
	4k27	U	RF02695	0.214286	0.0714286	0.0714286	0
	4oji	A	RF02684	0.0384615	0.0384615	0.192308	0
	4p5j	A	RF00233	0.52381	0.418605	0.428571	0.348837
	4p95	A	RF01807	0.0319149	0.0106383	0	0.0106383
	4pqv	A	RF01415	0.176471	0.205882	0.205882	0.147059
	4qln	A	RF00379	0.62069	0.103448	0.189655	0.465517
	4rum	A	RF02683	0.652174	0.391304	0.434783	0.413043
	5dun	A	RF00921	0.0740741	0.111111	0.148148	0.0740741
	5k7d	A	RF02679	0.458333	0.416667	0.458333	0.458333
	5kpy	A	RF01982	0.0555556	0.0555556	0	0
	5m0h	A	RF00606	0.190476	0	0.0952381	0
	5ob3	A	RF01300	0.117647	0.0294118	0	0.0588235
	5t5a	A	RF02681	0.225806	0.129032	0.0967742	0.193548
	5u3g	B	RF00442	0.404762	0.47619	0.261905	0.190476
	6cb3	A	RF00080	0.361702	0.0208333	0.12	0.170213
	6ck5	A	RF00442	0.388889	0.259259	0.277778	0.166667
	6fz0	A	RF01826	0.208333	0.208333	0.166667	0.166667
	2oiu	P	RF03017	0.111111	0.0555556	0.0555556	0.0277778
	3suh	X	RF01831	0.52	0.56	0.6	0.5
	5t83	A	RF00442	0.466667	0.311111	0.466667	0.244444
	1nbs	A	RF00011	0.65	0.466667	0.583333	0.483333
	1ffz	A	RF02540	0.701613	0.322581	0.229839	0.346774
	1kh6	A	RF00061	0.166667	0	0.0833333	0.0833333
	1kxk	A	RF00029	0.342857	0	0.257143	0.371429
	1u9s	A	RF00010	0.679487	0.115385	0.641026	0.487179
	1xjr	A	RF00164	0.416667	0.416667	0.416667	0.416667
	1y0q	A	RF00028	0.307018	0.0614035	0.0263158	0.350877
	2a64	A	RF00011	0.677852	0.402685	0.456376	0.456376
	2il9	A	RF00458	0.176471	0.102941	0.117647	0.0735294
	3cw5	A	RF00005	0.657	0.631579	0.631579	0.578947
	3f2q	X	RF00050	0.62963	0.12963	0.518519	0.462963
	3ox0	A	RF00504	0.659091	0.113636	0.545455	0.340909
	3r4f	A	RF00044	0.242424	0.30303	0.121212	0.242424
	3t4b	A	RF00061	0.238095	0.0238095	0	0.166667
	4frg	B	RF01689	0.547619	0.261905	0.309524	0.404762
	4gxy	A	RF00174	0.617284	0	0.222222	0.197531
	4jrc	A	RF02447	0.214286	0.321429	0.0357143	0.214286
	4l81	A	RF01725	0.520833	0	0.479167	0.229167
	4plx	A	RF02266	0	0.0526316	0.0789474	0
	4r4v	A	RF02927	0.182796	0.0107527	0	0.0107527
	4rzd	A	RF02680	0.26	0.16	0.1	0.12
	4y1o	A	RF02001	0.294574	0.0620155	0	0.131783
	6cu1	A	RF02553	0.65	0.55	0.25	0.375
	6d3p	A	RF02888	0	0.0909091	0.0454545	0
	6dnr	A	RF00442	0.462963	0.333333	0.222222	0.2037
			Average	0.430331	0.222383	0.279847	0.274802

## Sheet: Table 5 (Trim L2)
	PDB Code	Chain	Family	SeqRef	Gap 0.5	Gap 0.2
	1ehz	A	RF00005	0.736842	0.736842	0.736842
	3rg5	A	RF01852	0.744186	0.744186	0.744186
	3d2g	A	RF00059	0.657895	0.657895	0.657895
	5lys	A	RF00100	0.785714	0.821429	0.785714
	3gx5	A	RF00162	0.702128	0.702128	0.702128
	4tzx	X	RF00167	0.833333	0.833333	0.833333
	3dil	A	RF00168	0.724138	0.724138	0.724138
	2h0s	B	RF00234	0.596774	0.590164	0.596774
	3pdr	A	RF00380	0.6625	0.65	0.6625
	4yaz	A	RF01051	0.666667	0.666667	0.666667
	3slq	A	RF01510	0.393939	0.393939	0.393939
	4enc	A	RF01734	0.692308	0.692308	0.692308
	4xwf	A	RF01750	0.5	0.53125	0.5625
	5nwq	A	RF01763	0.35	0.35	0.35
	3q3z	A	RF01786	0.710526	0.710526	0.710526
	4lvv	A	RF01831	0.681818	0.681818	0.659091
	4wfl	A	RF01854	0.72	0.686275	0.686275
	1gid	A	RF00028	0.379747	0.341772	0.367089
	1z43	A	RF00169	0.4	0.42	0.4
	3e5c	A	RF01767	0.384615	0.346154	0.346154
	3nkb	B	RF02682	0.34375	0.46875	0.46875
	3npq	A	RF01057	0.423077	0.461538	0.461538
	3zp8	A	RF00163	0.0454545	0.0454545	0.0454545
	4jf2	A	RF01054	0.421053	0.394737	0.394737
	4k27	U	RF02695	0.214286	0.285714	0.25
	4oji	A	RF02684	0.0384615	0.0384615	0.0769231
	4p5j	A	RF00233	0.52381	0.52381	0.52381
	4p95	A	RF01807	0.0319149	0.0638298	0.0425532
	4pqv	A	RF01415	0.176471	0.147059	0.147059
	4qln	A	RF00379	0.62069	0.62069	0.637931
	4rum	A	RF02683	0.652174	0.652174	0.630435
	5dun	A	RF00921	0.0740741	0.185185	0.185185
	5k7d	A	RF02679	0.458333	0.541667	0.5
	5kpy	A	RF01982	0.0555556	0.0555556	0.0555556
	5m0h	A	RF00606	0.190476	0	0.238095
	5ob3	A	RF01300	0.117647	0.0882353	0.0882353
	5t5a	A	RF02681	0.225806	0.193548	0.16129
	5u3g	B	RF00442	0.404762	0.5	0.5
	6cb3	A	RF00080	0.361702	0.354167	0.361702
	6ck5	A	RF00442	0.388889	0.388889	0.388889
	6fz0	A	RF01826	0.208333	0.208333	0.208333
	2oiu	P	RF03017	0.111111	0.111111	0.111111
	3suh	X	RF01831	0.52	0.52	0.52
	5t83	A	RF00442	0.466667	0.533333	0.488889
	1nbs	A	RF00011	0.65	0.683333	0.683333
	1ffz	A	RF02540	0.701613	0.701613	0.701613
	1kh6	A	RF00061	0.166667	0	0.166667
	1kxk	A	RF00029	0.342857	0.371429	0.371429
	1u9s	A	RF00010	0.679487	0.679487	0.679487
	1xjr	A	RF00164	0.416667	0.416667	0.416667
	1y0q	A	RF00028	0.307018	0.307018	0.307018
	2a64	A	RF00011	0.657	0.677852	0.677852
	2il9	A	RF00458	0.176471	0.176471	0.176471
	3cw5	A	RF00005	0.657	0.657895	0.657895
	3f2q	X	RF00050	0.62963	0.666667	0.666667
	3ox0	A	RF00504	0.659091	0.636364	0.636364
	3r4f	A	RF00044	0.242424	0.0909091	0.0909091
	3t4b	A	RF00061	0.238095	0.238095	0.238095
	4frg	B	RF01689	0.547619	0.571429	0.571429
	4gxy	A	RF00174	0.617284	0.666667	0.62963
	4jrc	A	RF02447	0.214286	0.25	0.25
	4l81	A	RF01725	0.520833	0.541667	0.520833
	4plx	A	RF02266	0	0.0263158	0.0263158
	4r4v	A	RF02927	0.182796	0.129032	0.129032
	4rzd	A	RF02680	0.26	0.26	0.26
	4y1o	A	RF02001	0.294574	0.294574	0.294574
	6cu1	A	RF02553	0.65	0.65	0.65
	6d3p	A	RF02888	0	0.0454545	0.0454545
	6dnr	A	RF00442	0.462963	0.444444	0.462963
			Average	0.430029	0.432557	0.435873

## Sheet: Table 6 (ContactDef L2)
	PDB Code	Chain	Family	C1'-C1' (12 Å)	N1-N9 (9.5 Å)	ALL (3.5 Å)	ALL (5.5 Å)	ALL (7.5 Å)	ALL (9.5 Å)
	1ehz	A	RF00005	0.842	0.736842	0.816	0.868	0.921	0.921
	3rg5	A	RF01852	0.744	0.744186	0.744	0.791	0.791	0.791
	3d2g	A	RF00059	0.711	0.657895	0.658	0.816	0.816	0.816
	5lys	A	RF00100	0.75	0.785714	0.75	0.857	0.929	0.964
	3gx5	A	RF00162	0.702	0.702128	0.681	0.745	0.809	0.809
	4tzx	X	RF00167	0.829	0.833333	0.8	0.886	0.971	1
	3dil	A	RF00168	0.736	0.724138	0.701	0.805	0.885	0.931
	2h0s	B	RF00234	0.581	0.596774	0.565	0.694	0.823	0.871
	3pdr	A	RF00380	0.662	0.6625	0.637	0.713	0.775	0.825
	4yaz	A	RF01051	0.69	0.666667	0.619	0.714	0.81	0.833
	3slq	A	RF01510	0.382	0.393939	0.353	0.471	0.471	0.529
	4enc	A	RF01734	0.692	0.692308	0.692	0.769	0.769	0.808
	4xwf	A	RF01750	0.5	0.5	0.5	0.562	0.594	0.625
	5nwq	A	RF01763	0.5	0.35	0.45	0.55	0.65	0.7
	3q3z	A	RF01786	0.703	0.710526	0.73	0.865	0.892	0.892
	4lvv	A	RF01831	0.727	0.681818	0.682	0.705	0.841	0.864
	4wfl	A	RF01854	0.698	0.72	0.736	0.774	0.792	0.811
	1gid	A	RF00028	0.38	0.379747	0.329	0.418	0.468	0.494
	1z43	A	RF00169	0.4	0.4	0.34	0.38	0.44	0.46
	3e5c	A	RF01767	0.346	0.384615	0.385	0.423	0.462	0.538
	3nkb	B	RF02682	0.375	0.34375	0.188	0.188	0.406	0.406
	3npq	A	RF01057	0.48	0.423077	0.44	0.56	0.56	0.56
	3zp8	A	RF00163	0.476	0.0454545	0.047	0.0476	0.0476	0.0476
	4jf2	A	RF01054	0.447	0.421053	0.421	0.421	0.474	0.526
	4k27	U	RF02695	0.222	0.214286	0.185	0.333	0.444	0.481
	4oji	A	RF02684	0.08	0.0384615	0.08	0.12	0.2	0.2
	4p5j	A	RF00233	0.512	0.52381	0.512	0.535	0.535	0.581
	4p95	A	RF01807	0.032	0.0319149	0.021	0.0319	0.0319	0.0426
	4pqv	A	RF01415	0.206	0.176471	0.176	0.235	0.235	0.265
	4qln	A	RF00379	0.621	0.62069	0.603	0.759	0.793	0.81
	4rum	A	RF02683	0.717	0.652174	0.565	0.717	0.826	0.826
	5dun	A	RF00921	0.074	0.0740741	0.074	0.0741	0.0741	0.111
	5k7d	A	RF02679	0.522	0.458333	0.435	0.522	0.565	0.565
	5kpy	A	RF01982	0.143	0.0555556	0.057	0.0571	0.114	0.229
	5m0h	A	RF00606	0.190476	0.190476	0.095	0.143	0.19	0.19
	5ob3	A	RF01300	0.206	0.117647	0.058	0.0882	0.176	0.294
	5t5a	A	RF02681	0.225806	0.225806	0.194	0.29	0.323	0.355
	5u3g	B	RF00442	0.429	0.404762	0.405	0.524	0.571	0.595
	6cb3	A	RF00080	0.36	0.361702	0.34	0.4	0.42	0.42
	6ck5	A	RF00442	0.388889	0.388889	0.37	0.37	0.481	0.611
	6fz0	A	RF01826	0.292	0.208333	0.25	0.292	0.458	0.458
	2oiu	P	RF03017	0.143	0.111111	0.085	0.114	0.171	0.171
	3suh	X	RF01831	0.56	0.52	0.54	0.62	0.66	0.68
	5t83	A	RF00442	0.489	0.466667	0.467	0.578	0.644	0.644
	1nbs	A	RF00011	0.683	0.65	0.583	0.7	0.8	0.85
	1ffz	A	RF02540	0.512	0.701613	0.452	0.508	0.593	0.657
	1kh6	A	RF00061	0.125	0.166667	0.125	0.125	0.167	0.167
	1kxk	A	RF00029	0.342857	0.342857	0.343	0.343	0.343	0.343
	1u9s	A	RF00010	0.675	0.679487	0.675	0.87	0.935	0.948
	1xjr	A	RF00164	0.478	0.416667	0.435	0.565	0.652	0.652
	1y0q	A	RF00028	0.351	0.307018	0.316	0.421	0.456	0.482
	2a64	A	RF00011	0.732	0.677852	0.631	0.725	0.832	0.852
	2il9	A	RF00458	0.224	0.176471	0.254	0.313	0.328	0.358
	3cw5	A	RF00005	0.658	0.657	0.711	0.763	0.816	0.868
	3f2q	X	RF00050	0.62963	0.62963	0.593	0.667	0.704	0.741
	3ox0	A	RF00504	0.698	0.659091	0.628	0.698	0.791	0.814
	3r4f	A	RF00044	0.273	0.242424	0.182	0.303	0.364	0.394
	3t4b	A	RF00061	0.262	0.238095	0.19	0.262	0.381	0.548
	4frg	B	RF01689	0.547619	0.547619	0.571	0.571	0.595	0.595
	4gxy	A	RF00174	0.765	0.617284	0.716	0.815	0.889	0.901
	4jrc	A	RF02447	0.25	0.214286	0.179	0.179	0.286	0.357
	4l81	A	RF01725	0.625	0.520833	0.417	0.479	0.604	0.646
	4plx	A	RF02266	0.026	0	0	0.0263	0.0263	0.0526
	4r4v	A	RF02927	0.247	0.182796	0.118	0.151	0.247	0.301
	4rzd	A	RF02680	0.286	0.26	0.245	0.327	0.388	0.449
	4y1o	A	RF02001	0.294574	0.294574	0.279	0.318	0.333	0.333
	6cu1	A	RF02553	0.7	0.65	0.6	0.7	0.775	0.775
	6d3p	A	RF02888	0	0	0	0	0.0455	0.0909
	6dnr	A	RF00442	0.491	0.462963	0.434	0.566	0.585	0.604
			Average	0.458578	0.430331	0.412362	0.481467	0.539774	0.569981
